# Supplementary material for: A homogenous “signal-on” aptasensor for antibiotics based on a single stranded DNA binding protein-quantum dot aptamer probe coupling exonuclease-assisted target recycling for signal amplification
Source: Royal Society of Chemistry journal article supplement (doi:10.1039/c6ra27337h), 2017-01-01
Supplement: c6ra27337h1.pdf [file c6ra27337h1.pdf]

## Supporting Information

**A homogenous “signal-on” aptasensor for antibiotics based on single stranded DNA binding protein-quantum dot aptamer probe coupling exonuclease-assisted target recycling for signal amplification**

**Caiye wu<sup>a,b</sup>, Ning Gan<sup>b\*</sup>, Changrong Ou<sup>a\*\*</sup>, Haiqing Tang<sup>c</sup>, Jinxuan Cao<sup>a</sup>**

<sup>a</sup> Faculty of marine, Ningbo University, Ningbo, China, 315211

<sup>b</sup> Faculty of material science and chemical engineering, Ningbo University, Ningbo, China, 315100

<sup>c</sup> School of food science and technology, Zhejiang Pharmaceutical College, Ningbo, China, 315211

\*Corresponding Author Tel: + 86-574-87609987; Fax: +86-574-8760998.

E-mail address: [ganning@nbu.edu.cn](mailto:ganning@nbu.edu.cn), [ouchangrong@nbu.edu.cn](mailto:ouchangrong@nbu.edu.cn)

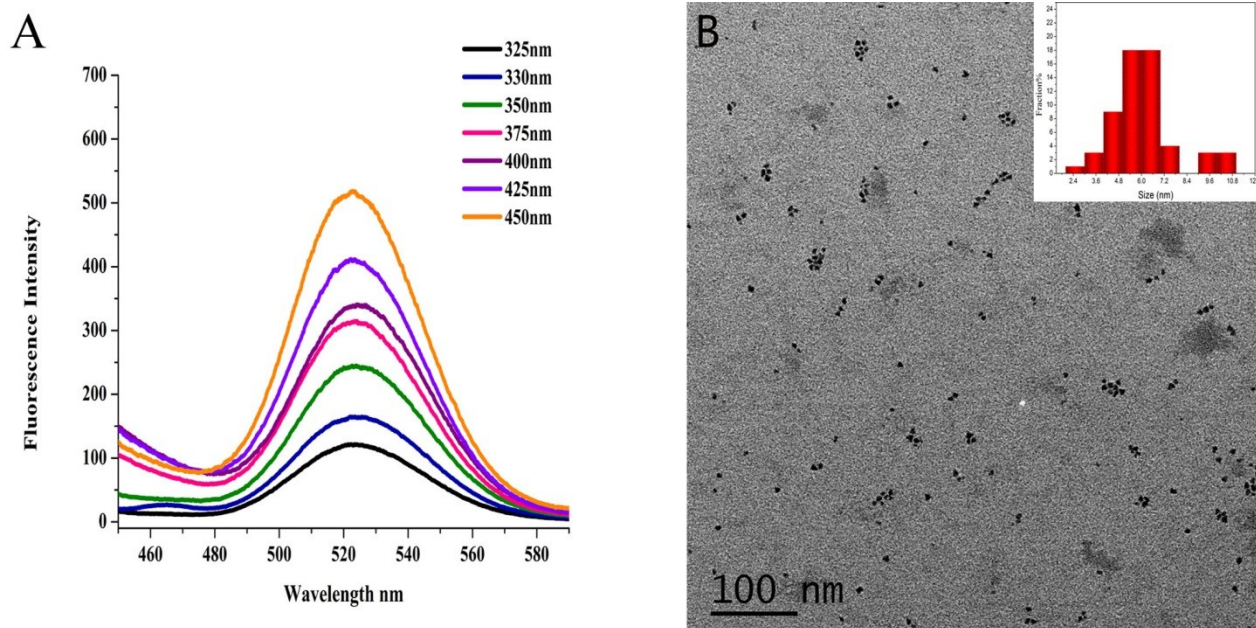

**Fig. S1** Characterization of the CdSe quantum dots; (A) the emission spectra of CdSe QDs under different excitation wavelength. (B) TEM image of the QDs (the inset represents the pore size distribution of QDs)

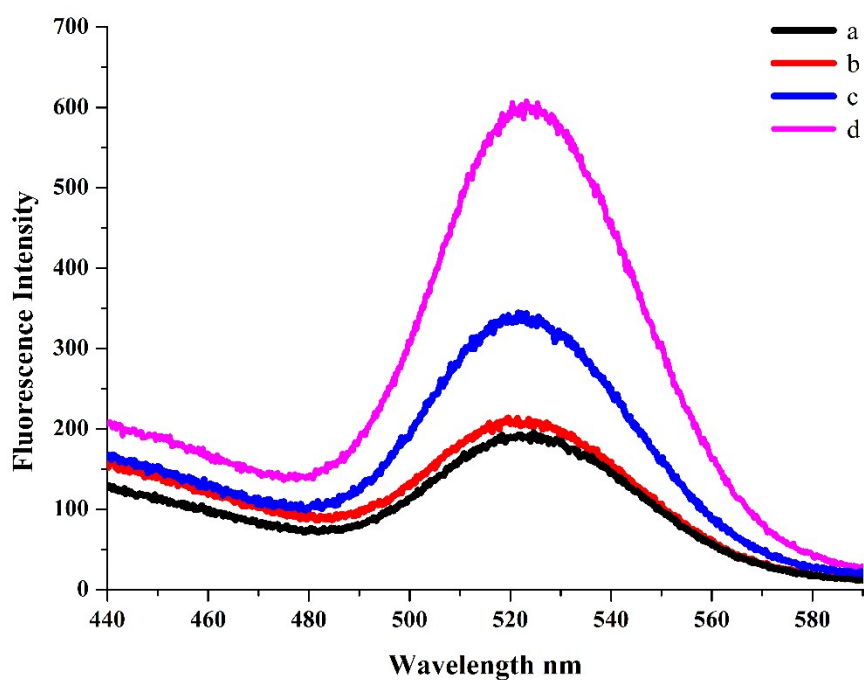

**Fig. S2** The fluorescence responses of the aptasensor without STR using aptamer as bridging media (QDS@Aptamer@QDs) (a), without STR using random sequence as bridging media (QDS@ Random sequence@QDs) (b), adding 20nM STR(c)(QDS@Aptamer@QDs@STR), adding 20nM STR in the presence of exonuclease I (QDs@)Aptamer@QDs@STR@Exo-1 (d).

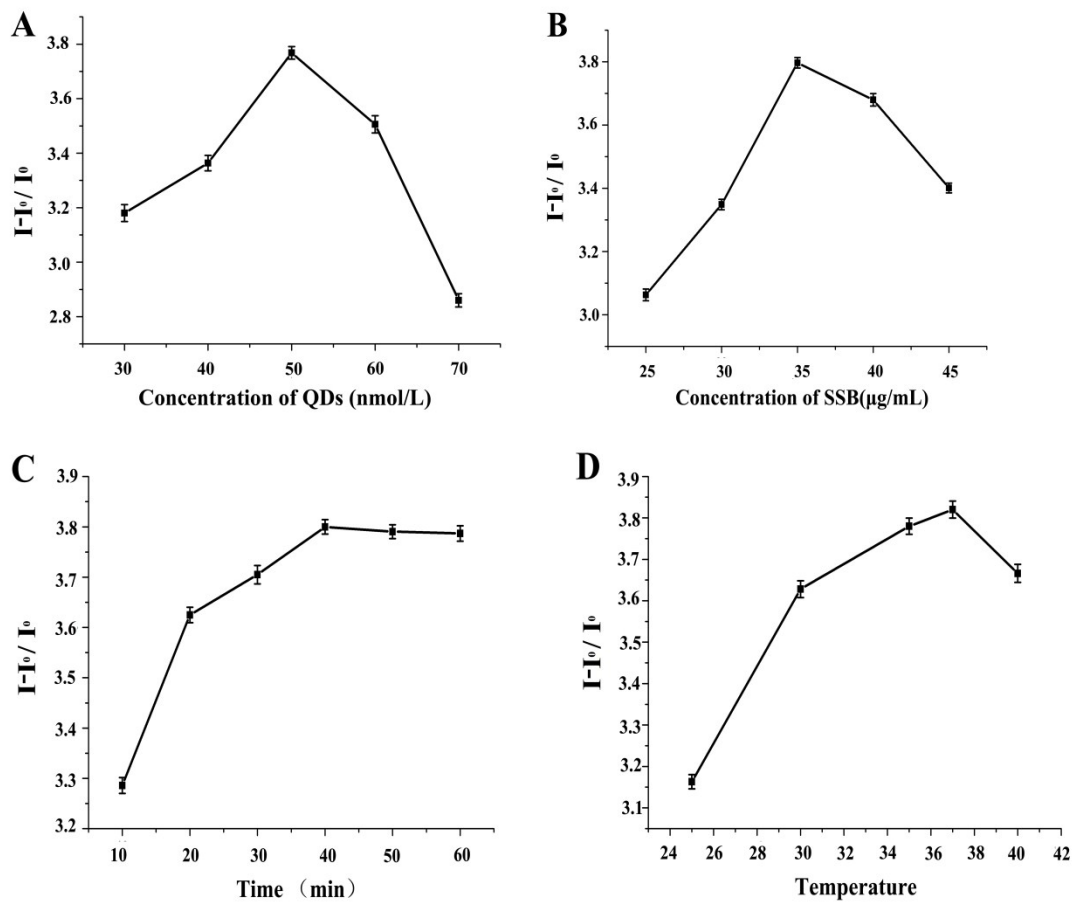

**Fig. S3** Explored the best experimental conditions of concentration of QDS (A) and SSB(B), reaction time(C), reaction temperature(D)

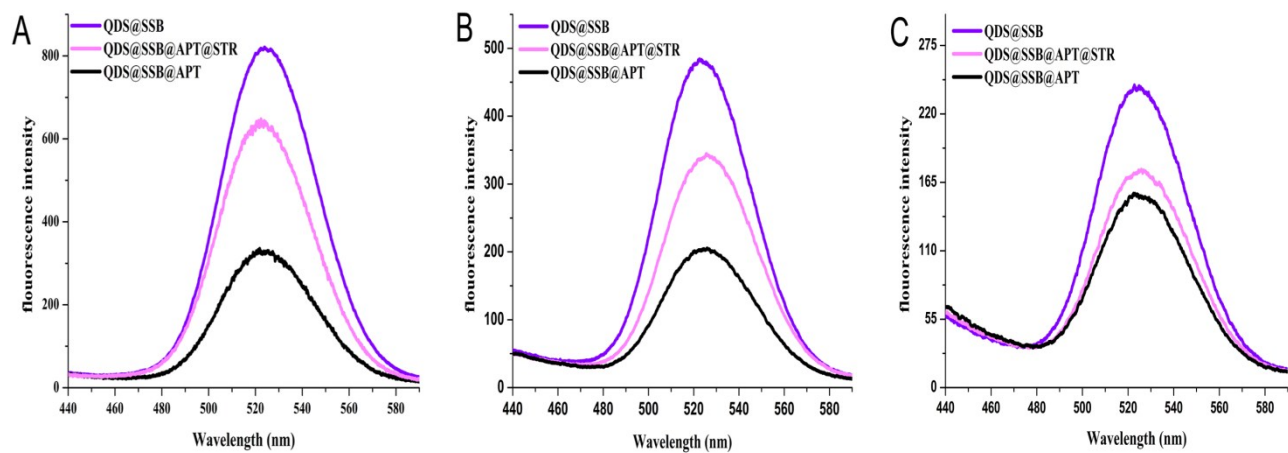

**Fig. S4** (A) Emission spectra of the reaction system after addition of STR for the first cycle. (B) For the fourth cycle through adding STR based on the proceeding system. (C) For the eighth cycle through adding STR based on the proceeding solution.

**Table S1** The assay compared with other methods for the detection of STR.

| Method                                       | Target analyte: STR<br>(ng mL <sup>-1</sup> ) |      | Reaction time<br>with target<br>(min) | Reference |
|----------------------------------------------|-----------------------------------------------|------|---------------------------------------|-----------|
|                                              | Linear<br>range                               | LOD  |                                       |           |
| MIP-CP voltametric<br>sensor                 | 0.32–32                                       | 0.1  | -                                     | [1]       |
| Chemiluminescence immu<br>noassay            | 10-100                                        | 0.04 | 60                                    | [2]       |
| Electrospray ionization<br>mass spectrometry | 1-5000                                        | -    | -                                     | [3]       |
| Enzyme immunoassay                           | 0.08-100                                      | 0.52 | 45                                    | [4]       |
| This work                                    | 0.01-100                                      | 0.03 | 40                                    | This work |

Note: The symbol ‘-’ suggest that the result could not be clearly stated in the article.

### References

- [1] M. B. Gholivand, M. Shamsipur, S. Dehdashtian and H. R. Rajabi, *Mater. Sci. Eng., C*, 2014, **36**, 102–107.
- [2] S. Pilehvar, J. Mehta, F. Dardenne, J. Robbens and R. Blust, *Anal. Chem.*, 2010, **84**, 6753.
- [3] X. Y. Huang, X. W. Fang, X. Zhang, X. M. Dai, X. L. Guo, H. W. Chen and L. P. Luo, *Anal. Bioanal. Chem.*, 2014, **406**, 7705.
- [4] A. Y. Kolosova, J. V. Samsonova and A. M. Egorov, *Food Agric. Immunol.*, 2000, **12**, 115.
